# Supplementary material
Source: PubMed Central journal article supplement (PMC6294691)
Supplement: NIHMS993088-supplement-Supp_info.pdf [file NIHMS993088-supplement-Supp_info.pdf]

*Supplemental Data*

**LKB1 regulates PRMT5 activity in breast cancer**

Hanine Lattouf, Loay Kassem , Julien Jacquemetton , Ali Choucair, Coralie Poulard, Olivier

Trédan, Laura Corbo , Mona Diab-Assaf, Nader Hussein, Isabelle Treilleux and Muriel Le

Romancer

### ***Supplemental method***

#### **Immunofluorescence**

MCF-7 cells ( $7 \times 10^4$ ) were grown on coverslips in 12-well plates. After treatment, cells were fixed in methanol for 2 min and washed twice in PBS. Non-specific binding was blocked using a 1% gelatin solution for 30 min at room temperature and cells were incubated with primary antibodies for 1 hr at 37°C. After PBS washes, the cells were incubated for another 1 hr at 37°C with the secondary antibody Alexa Fluor 488 (Molecular Probes) in Dako diluent, then washed in PBS and mounted on glass slides in mounting solution (Dako). The images were acquired using a fluorescent microscope.

**Supplementary Table 1. siRNA targeted sequences**

| <b>siRNA</b> | <b>Sequence (5'-3')</b>       |
|--------------|-------------------------------|
| siPRMT5      | CACAGUACUACAUGGCUUU[dT][dT]   |
| siMEP50      | CUCCUUACCAUUAACUGA[dT][dT]    |
| siLKB1 E2    | CGAAGAGAAGCAGAAAAUGU[dT][dT]  |
| siLKB1 E4    | AAGGACAUCAAGCCGGGGAAC[dT][dT] |
| siLKB1 E14   | GAGGAGGUUACGGCACAAAAA[dT][dT] |

**Supplementary Table 2.**

**List and dilutions of antibodies used for each method**

| <b>Antibody</b>      | <b>Company</b>            | <b>Catalog Number</b> | <b>Species</b> | <b>WB</b> | <b>PLA</b> | <b>IF</b> | <b>IP</b> | <b>IHC</b> |
|----------------------|---------------------------|-----------------------|----------------|-----------|------------|-----------|-----------|------------|
| <b>Flag</b>          | Euromedex                 | EL1-B11               | Mouse          | 1:1000    |            | 1:500     |           |            |
| <b>GAPDH</b>         | Meridian Life Science     | H86504M               | Mouse          | 1:25000   |            |           |           |            |
| <b>LKB1</b>          | Santa Cruz Biotechnology  | Sc-32245              | Mouse          | 1:1000    | 1:100      |           |           |            |
| <b>LKB1</b>          | Millipore                 | 07-694                | Rabbit         |           |            |           | 2µg       |            |
| <b>LKB1</b>          | Abcam                     | Ab58786               | Rabbit         |           |            |           |           | 1:50       |
| <b>MEP50</b>         | Cell Signaling Technology | 2823S                 | Rabbit         | 1:1000    | 1:100      |           |           |            |
| <b>Pan Phospho-T</b> | Cell Signaling Technology | 9381S                 | Rabbit         | 1:1000    |            |           | 8µg       |            |
| <b>pICln</b>         | Santa Cruz Biotechnology  | Sc-393525             | Mouse          | 1:1000    |            |           |           |            |
| <b>PRMT5</b>         | Santa Cruz Biotechnology  | Sc-376937             | Mouse          | 1:1000    | 1:100      |           |           |            |
| <b>PRMT5</b>         | Millipore                 | 07-405                | Rabbit         | 1:1000    | 1:100      |           |           | 1:400      |
| <b>PRMT5</b>         | Gift from J. Coté         |                       | Rabbit         |           |            |           | 1µg       |            |
| <b>RiOK1</b>         | Bethyl Laboratories       | A302-456A             | Rabbit         | 1:5000    |            |           |           |            |
| <b>Tubulin</b>       | Sigma Aldrich             | T6074                 | Mouse          | 1:10000   |            |           |           |            |
| <b>V5</b>            | Invitrogen                | P/N 46-0705           | Mouse          | 1:5000    |            | 1:200     | 2µg       |            |
| <b>V5</b>            | Cell Signaling Technology | 13202S                | Rabbit         | 1:1000    |            |           | 2ug       |            |

**Supplementary Table 3. Sequences of primers used to clone PRMT5 domains**

| Protein Domain | Primer's Type | Sequence (5'-3')                |
|----------------|---------------|---------------------------------|
| PRMT5 D1       | Forward       | GGATCCatggcggc gatggcggtcggggg  |
|                | Reverse       | CTCGAGagtgtggatgtggttggtcaaac   |
| PRMT5 D2       | Forward       | GGATCCggccatcactcttccatgttctgg  |
|                | Reverse       | CTCGAGgcttaagtattccaggtattggagg |
| PRMT5 D3       | Forward       | GGATCCcagaaccgtcctccacctaagcc   |
|                | Reverse       | CTCGAGatcatcttttaggaagtgtgggc   |
| PRMT5 D4       | Forward       | GGATCCggtgtgagcatccccgggagtac   |
|                | Reverse       | CTCGAGgaggccaatggtatatgagcggcc  |
| PRMT5 D1a      | Reverse       | CTCGAGtcccacaattagcgtattccagtc  |
| PRMT5 D1b      | Forward       | GGATCCaagctttctccatggattcgtec   |

**Supplementary Table 4.**

**Baseline characteristics for the 433 patients included in the TMA study.**

| <b>Characteristics</b>           |                                                 | <b>Number</b> | <b>Percent</b> |
|----------------------------------|-------------------------------------------------|---------------|----------------|
| <b>Age group</b>                 | <i>≤ 50 years</i>                               | 113           | 26.1%          |
|                                  | <i>&gt;50 years</i>                             | 320           | 73.9%          |
| <b>Menopausal status</b>         | <i>Premenopausal</i>                            | 121           | 28.5%          |
|                                  | <i>Post-menopausal</i>                          | 303           | 71.5%          |
|                                  | <i>Unknown</i>                                  | 9             |                |
| <b>BMI</b>                       | <i>≤ 25 kg/m<sup>2</sup></i>                    | 258           | 61.9%          |
|                                  | <i>&gt; 25 Kg/m<sup>2</sup></i>                 | 159           | 38.1%          |
|                                  | <i>Unknown</i>                                  | 16            |                |
| <b>Tumor size</b>                | <i>≤2cm</i>                                     | 252           | 58.2%          |
|                                  | <i>&gt;2cm</i>                                  | 181           | 41.8%          |
| <b>Axillary LN metastasis</b>    | <i>No</i>                                       | 184           | 42.5%          |
|                                  | <i>Yes</i>                                      | 249           | 57.5%          |
| <b>SBR grade</b>                 | <i>I</i>                                        | 82            | 18.9%          |
|                                  | <i>II</i>                                       | 207           | 47.8%          |
|                                  | <i>III</i>                                      | 144           | 33.3%          |
| <b>ERα status</b>                | <i>Negative</i>                                 | 56            | 12.9%          |
|                                  | <i>Positive</i>                                 | 377           | 87.1%          |
| <b>PR status</b>                 | <i>Negative</i>                                 | 109           | 25.2%          |
|                                  | <i>Positive</i>                                 | 324           | 74.8%          |
| <b>HER2 status</b>               | <i>Negative</i>                                 | 397           | 92.8%          |
|                                  | <i>Positive</i>                                 | 31            | 7.2%           |
|                                  | <i>Missing</i>                                  | 5             |                |
| <b>Breast cancer subtype</b>     | <i>Luminal A</i>                                | 243           | 56.1%          |
|                                  | <i>Luminal B</i>                                | 134           | 30.9%          |
|                                  | <i>HER2 enriched</i>                            | 11            | 4.6%           |
|                                  | <i>TNBC</i>                                     | 45            | 10.4%          |
| <b>Adjuvant hormonal regimen</b> | <i>Tamoxifen</i>                                | 173           | 46.6%          |
|                                  | <i>Sequential Tamoxifen-Aromatase Inhibitor</i> | 198           | 53.4%          |
|                                  | <i>Unknown</i>                                  | 62            |                |
| <b>Nuclear PRMT5 expression</b>  | <i>Low (H score ≤ 70)</i>                       | 141           | 36.2%          |
|                                  | <i>High (H score &gt;70)</i>                    | 249           | 63.8%          |
|                                  | <i>Unknown</i>                                  | 43            |                |

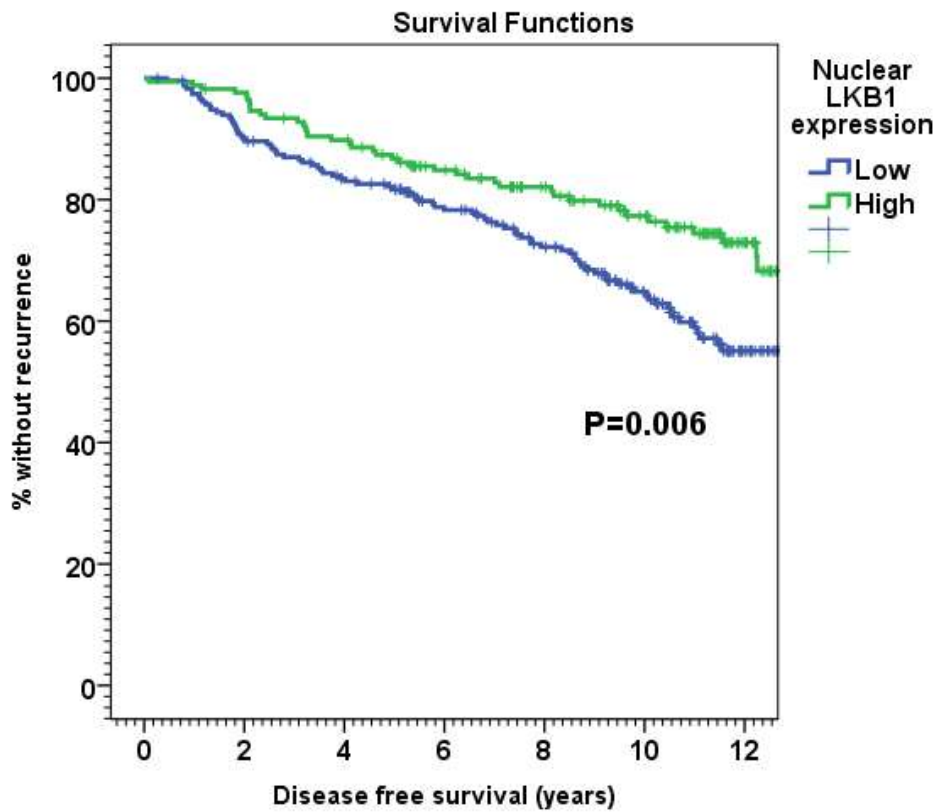

**Supplementary Figure 1: LKB1 expression in breast cancer.**

Kaplan-Meier plot of disease free survival (DFS) in the 433 patient samples across high LKB1 (i.e. H score > 0) in green versus low LKB1 expression (i.e. H score 0) in blue.

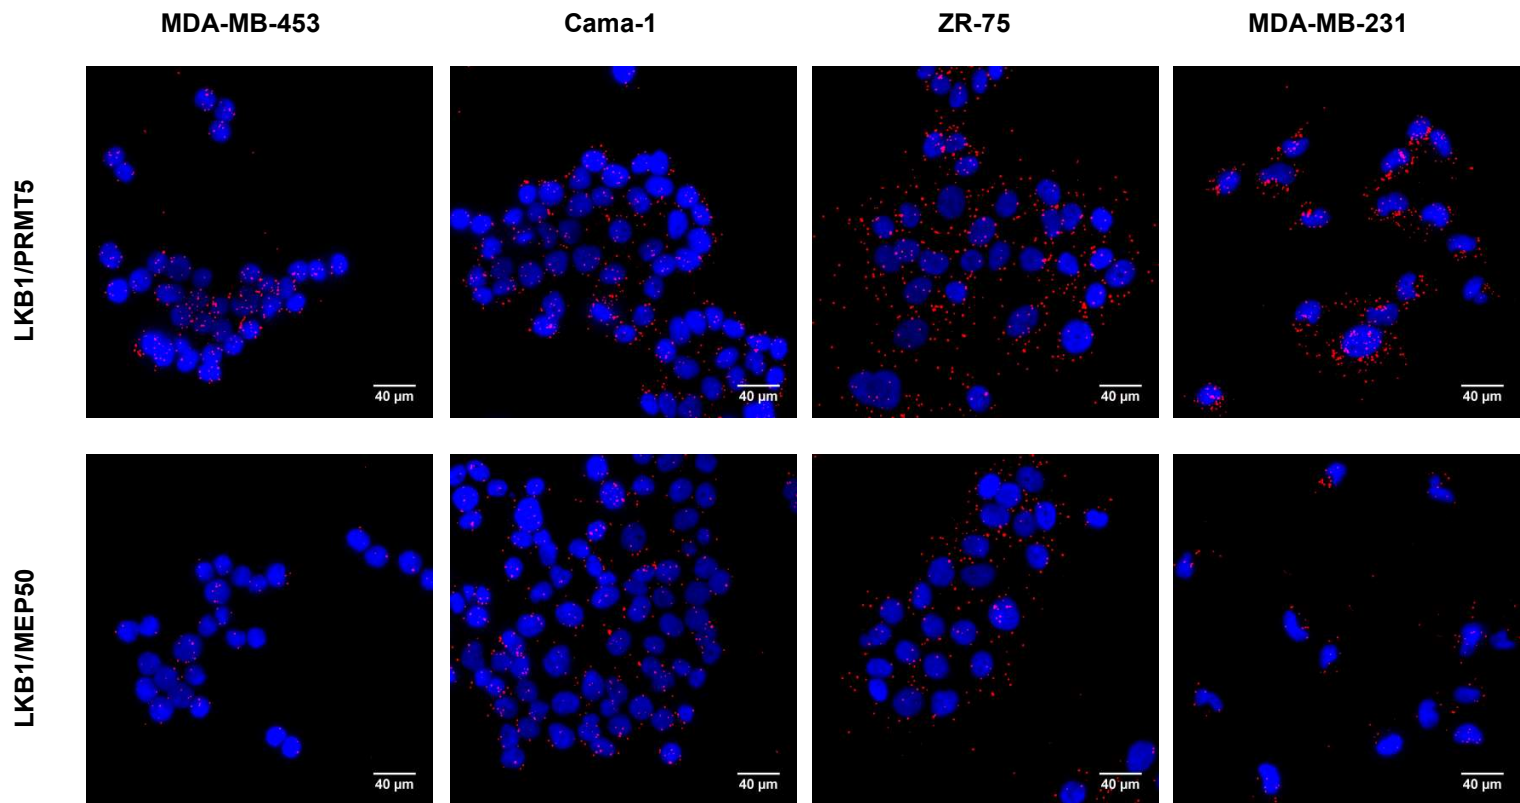

**Supplementary Figure 2: LKB1 interacts with PRMT5 and MEP50 in several mammary cell lines.**

*In situ* Proximity Ligation Assay (PLA) for LKB1/PRMT5 and LKB1/MEP50 dimers were performed in MDA-MB-453, Cama-1, ZR-75 and MDA-MB-231 cells using LKB1, PRMT5 and MEP50 antibodies. The detected dimers are represented by red dots. The nuclei were counterstained with mounting medium containing DAPI (blue) (Obj: X60).



**a**

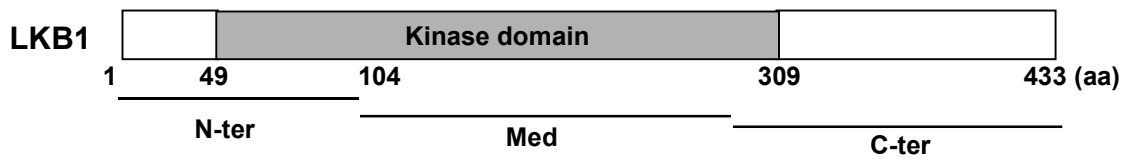

**b**

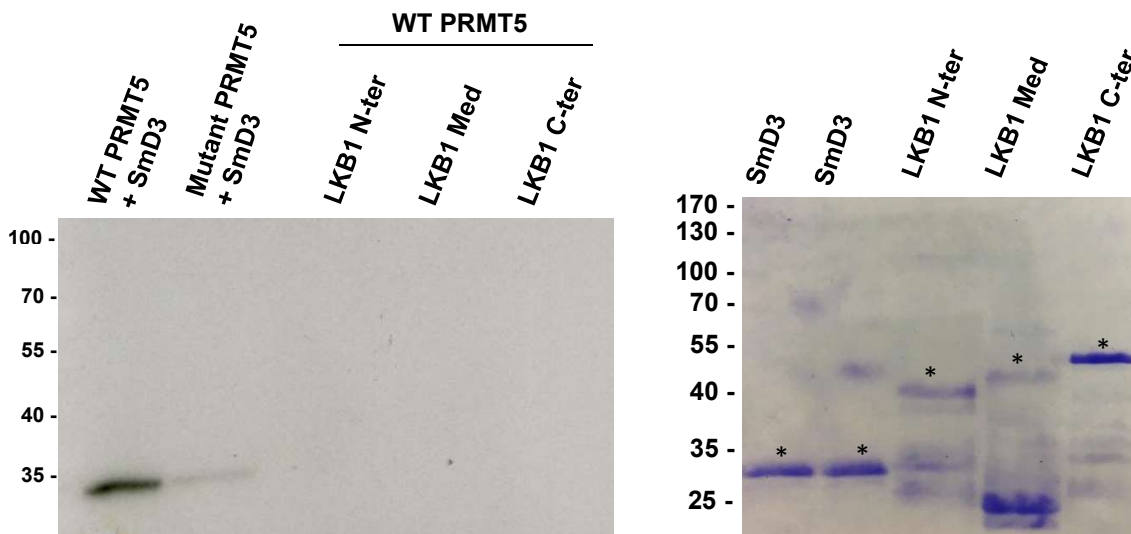

**Supplementary Figure 3: Fragments of LKB1 are not methylated by PRMT5.**

**(a)** Schematic representation of the different domains of LKB1.

**(b)** *In vitro* methylation of LKB1 was performed by incubating purified LKB1 fragments (2 $\mu$ g) with immunoprecipitated V5-PRMT5 (from 500 $\mu$ g of cell lysate overexpressing V5-PRMT5) in the presence of 0,75  $\mu$ M of [methyl-<sup>3</sup>H] SAM. 2 $\mu$ g of Smd3 was used as a positive control. Mutant PRMT5 was used as a negative control. Reaction products were analyzed by SDS-PAGE followed by fluorography for one week. The right panel shows the corresponding coomassie staining. \* indicates the full length fusion proteins.

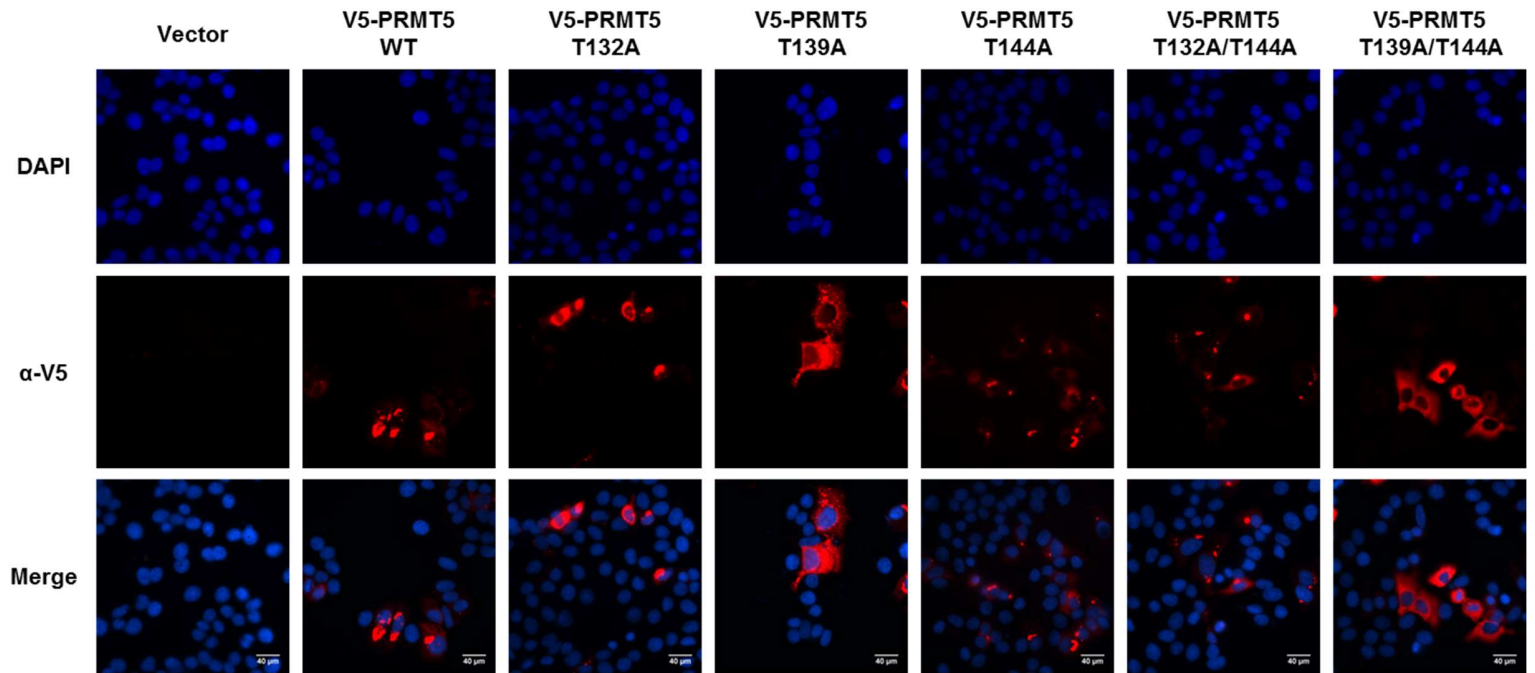

**Supplementary Figure 4: Study of the localization of PRMT5 mutants.**

MCF-7 cells were transfected with pcDNA3.1 vector or with V5-tagged PRMT5 WT and mutants for 48 hr, then fixed and stained with an anti-V5 antibody (red; middle panel). The nuclei were counterstained with mounting medium containing DAPI (blue; upper panel) (Obj: X60).

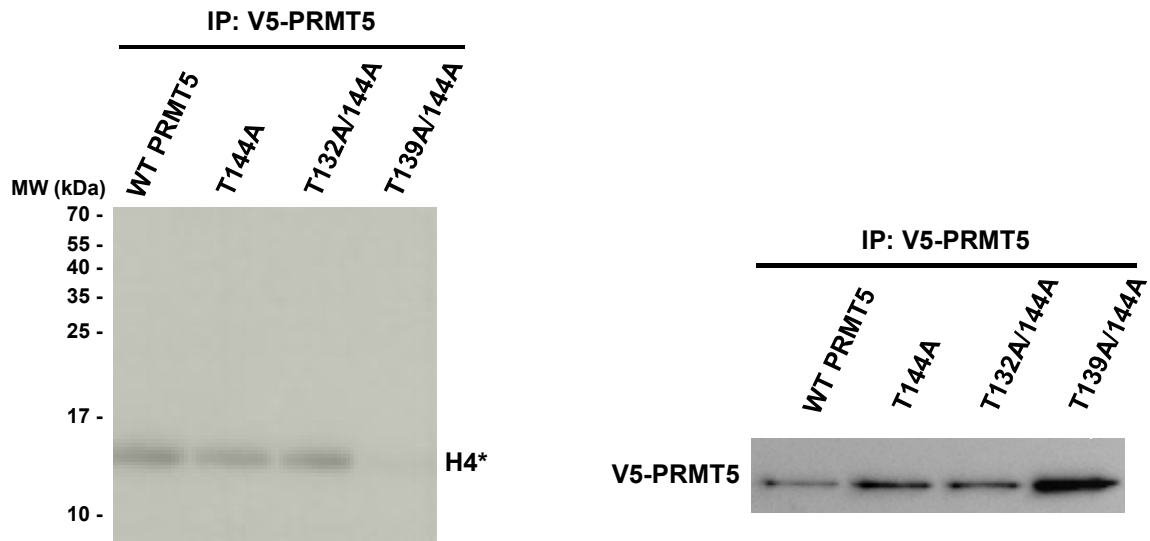

**Supplementary Figure 5: the T139/144 mutant of PRMT5 loses its capacity to methylate histone H4**

HeLa cells were transfected with the different V5-PRMT5 mutants for 48 hr. The catalytic activity of PRMT5 was assessed by immunoprecipitation using an anti-V5 antibody, followed by a radioactive *in vitro* methylation assay. 2  $\mu$ g of histone H4 was incubated with the immunoprecipitated V5-PRMT5 proteins (WT and mutants) in the presence of [methyl- $^3$ H] SAM. Reaction products were analyzed by SDS-PAGE followed by fluorography after 5 days of exposure (left panel). 1/20<sup>th</sup> of the IP was analyzed for V5-PRMT5 expression and protein expression was verified by Western blot (right panel).

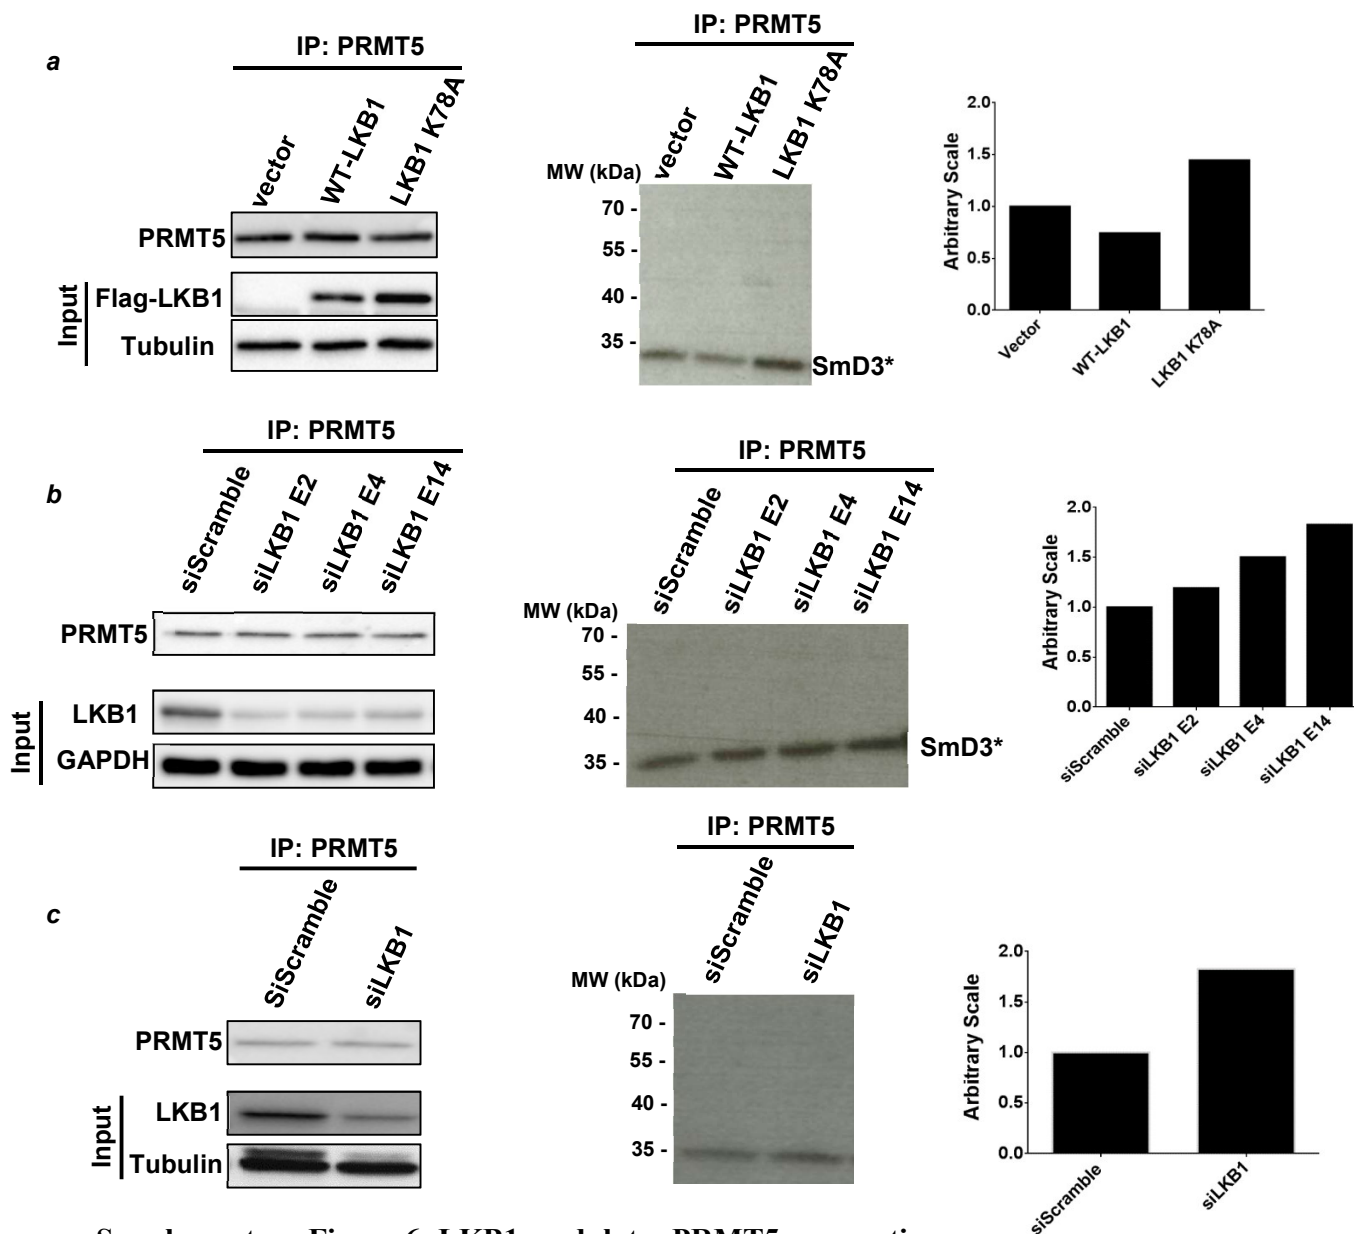

### Supplementary Figure 6: LKB1 modulates PRMT5 enzymatic activity

(a) HeLa cells were transfected with pSG5Flag-LKB1 and the kinase dead mutant, pSG5Flag-LKB1 K78A for 48 hr. Their expression was tested by Western blot analysis (left panel). Cell extracts were immunoprecipitated with an anti-PRMT5 antibody followed by *in vitro* methylation experiment using Smd3 as an exogenous substrate (middle panel). 1/20<sup>th</sup> of the IP was analyzed for PRMT5 expression and LKB1 expression control was checked by Western blot with an anti-Flag antibody on the left panel. Quantification of the immunoprecipitated PRMT5 activity was performed by computer-assisted analysis (right panel). This result is representative of two independent experiments.

(b) MCF-7 cells were transfected with siScramble or different siRNA targeting LKB1 for 48 hr. The knock down efficacy was checked by Western blot analysis. PRMT5 activity was assessed as in a (medium panel). 1/20<sup>th</sup> of the IP was analyzed for PRMT5 expression (left panel). Quantification of the immunoprecipitated PRMT5 activity was performed as in a (right panel).

(c) The experiment was performed as in b), except that LKB1 was knocked down with a pool of siRNAs.
